# Supplementary material
Source: PubMed Central journal article supplement (PMC5727893)
Supplement: NIHMS925301-supplement-Supplemental_Materials.pdf [file NIHMS925301-supplement-Supplemental_Materials.pdf]

## Supplementary Materials for

### **Detection of early pancreatic ductal adenocarcinoma with thrombospondin-2 and CA19-9 blood markers**

Jungsun Kim, William R. Bamlet, Ann L. Oberg, Kari G. Chaffee,  
Greg Donahue, Xing-Jun Cao, Suresh Chari, Benjamin A. Garcia,  
Gloria M. Petersen,\* Kenneth S. Zaret\*

\*Corresponding author. Email: zaret@upenn.edu

Published 12 July 2017, *Sci. Transl. Med.* **9**, eaah5583 (2017)  
DOI: 10.1126/scitranslmed.aah5583

#### **This PDF file includes:**

- Fig. S1. Validation of cross-reactivity of antibodies enclosed in THBS2 ELISA with THBS1 by Western blot.
- Fig. S2. Validation of cross-reactivity and interference of THBS1 in THBS2 ELISA.
- Fig. S3. Reproducibility of the ELISA for THBS2.
- Fig. S4. Distribution of THBS2 values in phase 2 samples.
- Fig. S5. Cross-validation tests, performed 1 year apart, of THBS2 concentrations in the same set of plasmas as determined in different laboratories.
- Fig. S6. Representative immunohistochemistry images of THBS2 in human normal pancreas, pancreatitis, and PDAC tissue.
- Table S1. List of 53 proteins secreted or released from 10-22 cell, PanIN-stage lesions that are at low abundance in healthy human plasma proteome and RNA-seq databases.
- Table S2. Mass spectrometry assessment of THBS2 concentrations in phase 1 plasma samples.
- Table S3. Range and median values of THBS2 and CA19-9 in this study.
- Table S4. Impact of excluding stage IIB (and unspecified stage II) subjects.
- Table S5A. THBS2 values by sex and diabetes mellitus status.
- Table S5B. Spearman correlation analysis of age and THBS2 values.
- Table S6A. Obstructive jaundice cases in the PDAC cohorts.
- Table S6B. THBS2 and CA19-9 values and obstructive jaundice status.
- Table S6C. AUC values for CA19-9, THBS2, and combined markers by jaundice status in phases 2a and 2b of PDAC cases versus controls.

Table S7A. Cross-tabulation of normal versus elevated THBS2 values, given a cutoff of 42 ng/ml, for the original cross-validation THBS2 assays ( $\kappa = 0.786$ ).

Table S7B. Cross-tabulation of normal versus elevated scaled THBS2 values, given a cutoff of 2.47, for the original and cross-validation THBS2 assays ( $\kappa = 0.895$ ).

Table S8. Summary of THBS2 immunohistochemistry in a total of 42 human PDAC and 4 cases of incidental PanIN and intraductal papillary mucinous neoplasm by immunohistochemistry.

## Figure S1

A. SDS-PAGE confirmation of expected relative sizes of recombinant THBS1, THBS2, THBS3, and THBS4 proteins obtained from Bio-Techne, Inc..

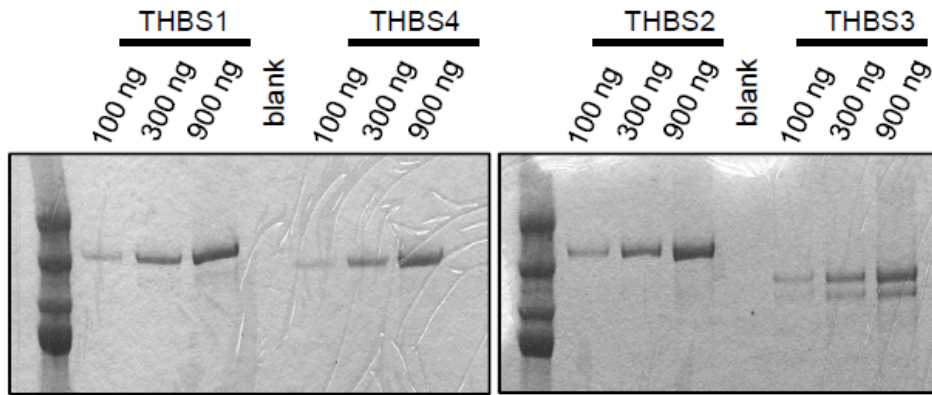

B. ELISA detection and capture antibodies for THBS2 are competed by THBS2, not by THBS1

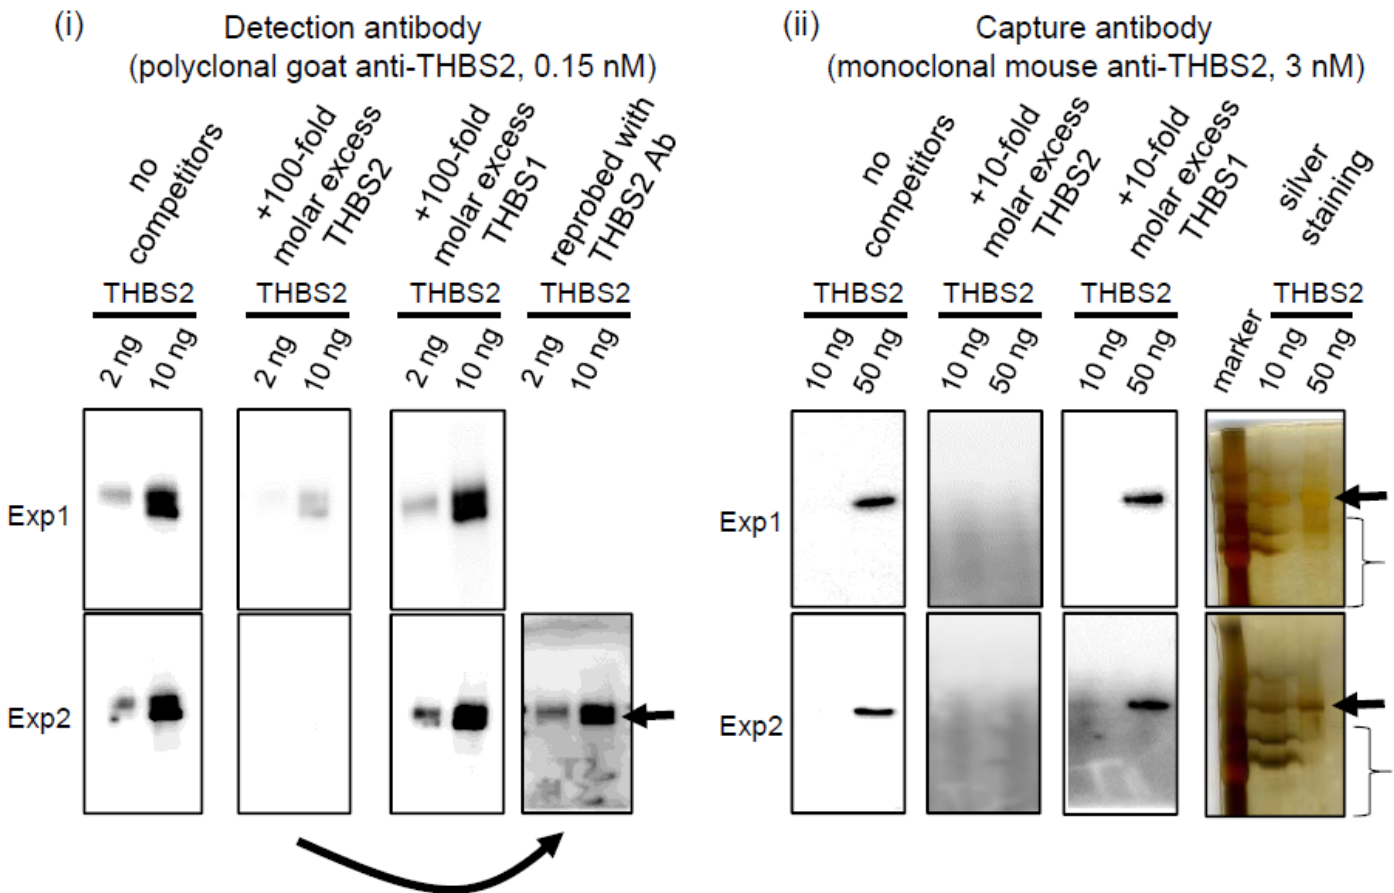

**Fig. S1. Validation of cross-reactivity of antibodies enclosed in THBS2 ELISA with THBS1 by Western blot.**

A. SDS-PAGE confirmation of expected relative sizes of recombinant THBS1, THBS2, THBS3, and THBS4 proteins obtained from Bio-Techne, Inc. The company had validated the specificity of the THBS2 ELISA kit with these recombinant proteins. Because of prior claims that THBS1 is down-regulated in PDAC (see text), we assessed the cross-reactivity of THBS1 against the detection and capture antibodies in the THBS2 ELISA kit in duplicate experiments (Exp1 and Exp2).

B. ELISA detection and capture antibodies for THBS2 are competed by THBS2, not by THBS1. (i) Samples (0.15 nM) of goat polyclonal anti-THBS2 detection antibody were used with no competitor or with a 100-fold molar excess of recombinant proteins THBS2 or THBS1 for 30 min at room temperature. The reactions were applied to Western blot membranes with 2 or 10 ng THBS2 in separate lanes. The excess THBS2 competes for the signal while the excess THBS1 does not. To demonstrate that the membrane for the THBS2 competition did have THBS2 protein, the first antibody reaction was stripped and the blot was re-probed (arrow) with the THBS2 antibody without competitor.

(ii) Samples (3 nM) of mouse monoclonal anti-THBS2 capture antibody were used with no competitor or with a 10-fold molar excess of recombinant proteins THBS2 or THBS1 for 30 min at room temperature. All THBS2 proteins were run in a gel and transferred into the same membrane. The membrane was blocked and divided into three pieces before applying the mixture of detection antibody and competitors. The reactions were applied to Western blot membranes with 10 or 50 ng THBS2 in separate lanes. The excess THBS2 competes for the signal while the excess THBS1 does not. To demonstrate that the membrane for the THBS2 competition did have THBS2 protein, the blot was stripped and stained with silver. Arrows point to recombinant THBS2 evident on the blot (signals were saturated at 10 ng). Brackets indicate the marker bands that spilled over from neighboring lanes. Note that the monoclonal capture antibody has less sensitivity than the polyclonal detection antibody.

## Figure S2

A. Presence of excess THBS1 has no effect on ELISA detection of recombinant THBS2 proteins

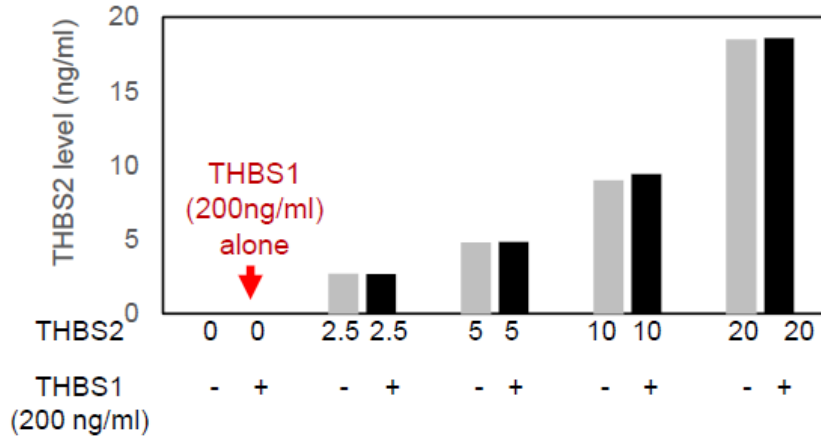

B. Presence of excess THBS1 has no effect on ELISA detection of THBS2 in human plasma

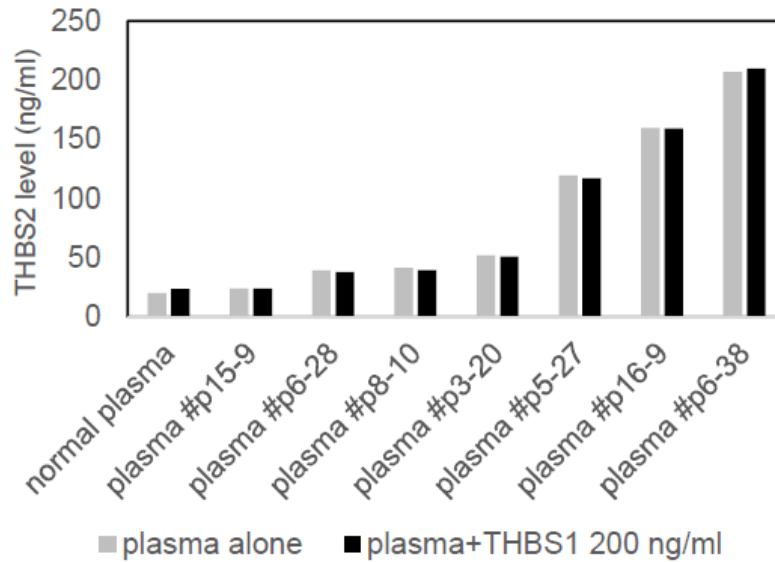

| THBS2 (ng/ml)         | normal plasma | plasma #p15-9 | plasma #p6-28 | plasma #p8-10 | plasma #p3-20 | plasma #p5-27 | plasma #p16-9 | plasma #p6-38 |
|-----------------------|---------------|---------------|---------------|---------------|---------------|---------------|---------------|---------------|
| plasma alone          | 20.4          | 24.2          | 39.3          | 41.7          | 51.9          | 119.6         | 159.6         | 207.1         |
| plasma+THBS1 200ng/ml | 23.7          | 24.3          | 38.3          | 39.8          | 51.2          | 117.4         | 159.3         | 210.0         |
| CV(%)                 | 10.7          | 0.3           | 1.9           | 3.3           | 0.9           | 1.3           | 0.1           | 1.0           |

**Fig. S2. Validation of cross-reactivity and interference of THBS1 in THBS2 ELISA.**

(A) Presence of excess THBS1 has no effect on ELISA detection of recombinant THBS2 proteins. To determine whether presence of THBS1 interferes with the THBS2 ELISA kit, 200 ng/ml of recombinant THBS1 protein was spiked into various concentrations of recombinant THBS2 proteins (0 ng/ml to 20 ng/ml) and subjected to THBS2 ELISA assays. Grey bars indicate THBS2 protein alone and black bars indicate THBS2 proteins spiked with THBS1. The differences in THBS2 detection are negligible (less than 5% CV).

(B) Presence of excess THBS1 has no effect on ELISA detection of THBS2 in human plasma. ELISA assays were performed on Phase 2b plasma samples randomly picked to exhibit a range of THBS2 concentrations, along with human normal pooled plasma, with and without 200 ng/ml THBS1 protein. Grey bars show the plasma alone and black bars show the plasma with a 200 ng/ml of THBS1. The differences in THBS2 concentration in Phase 2b plasmas between absence and presence of THBS1 protein (200 ng/ml) were less than 5% CV, while the very low concentrations in the commercial normal pooled plasma exhibited a 10% CV). Primary data are shown at bottom.

Figure S3

Reproducibility of the ELISA for THBS2

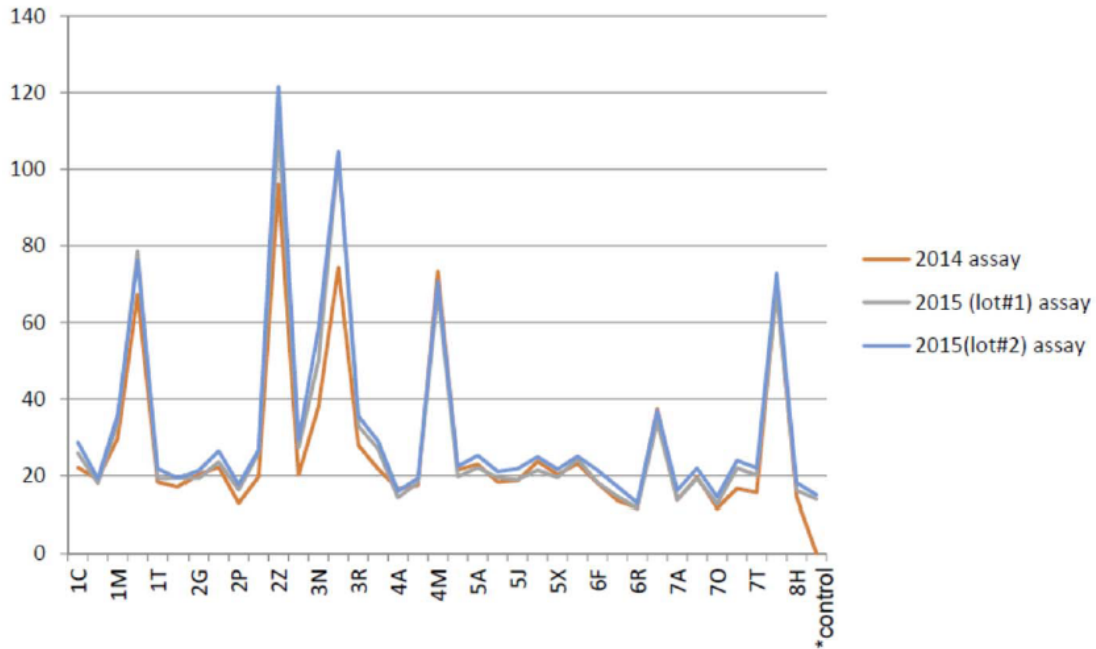

**Fig. S3. Reproducibility of the ELISA for THBS2.**

The plot shows primary ELISA data in nanograms THBS2 per ml of plasma for a set of Phase 2a samples. The signals were determined from a standard curve as described in the Materials and Methods. The same samples were assessed once in 2014 and twice in 2015, using different lots for each assay. The two assays in 2015 included a commercial plasma sample mixed from normal, healthy individuals (\*denoted "control").

Figure S4

Distribution of THBS2 values in Phase 2 samples

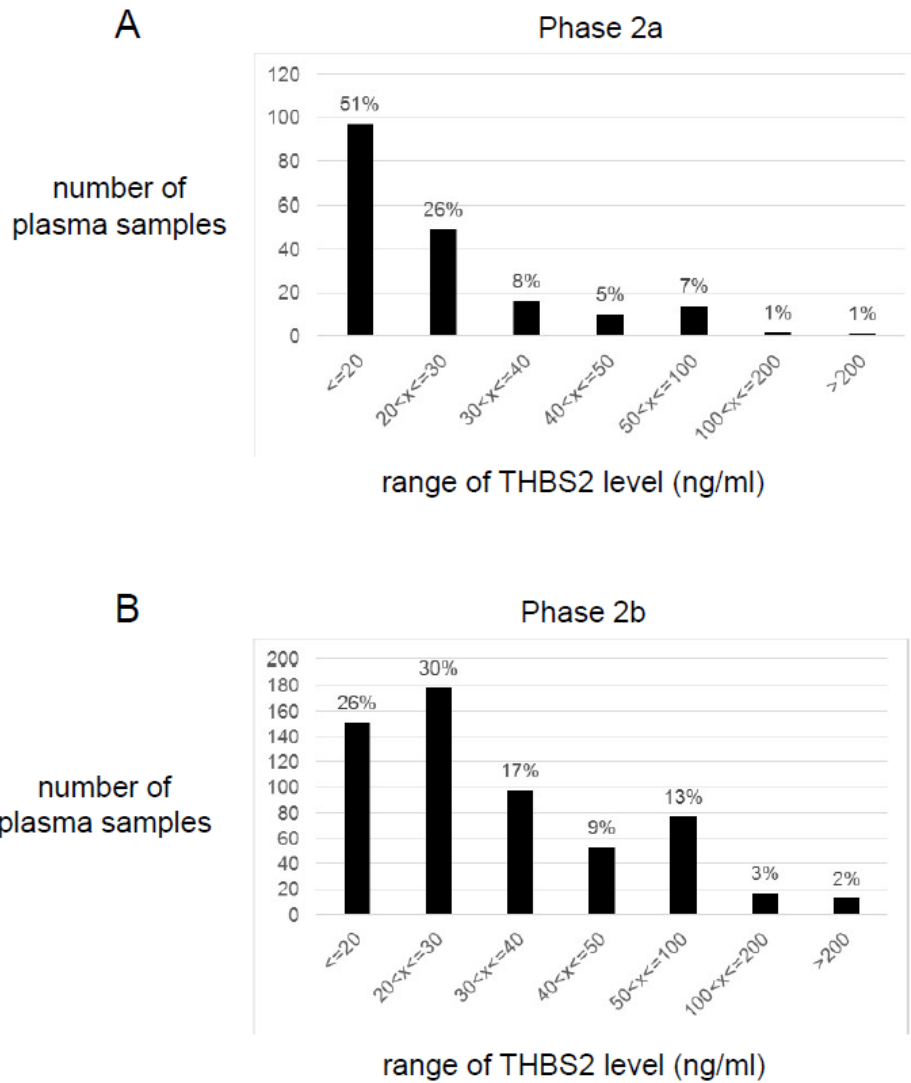

**Fig. S4. Distribution of THBS2 values in phase 2 samples.**

Data for Phase 2a (A) and Phase 2b (B) plasma samples in ELISA were rank-ordered and divided into 7 groups based upon THBS2 protein concentrations. The frequency of samples in each group is shown.



## Figure S5

Cross-validation tests, performed one year apart, of THBS2 levels in the same set of plasmas as determined in different laboratories

### A. Scatterplot of original THBS vs. validation THBS2 for N=38 samples

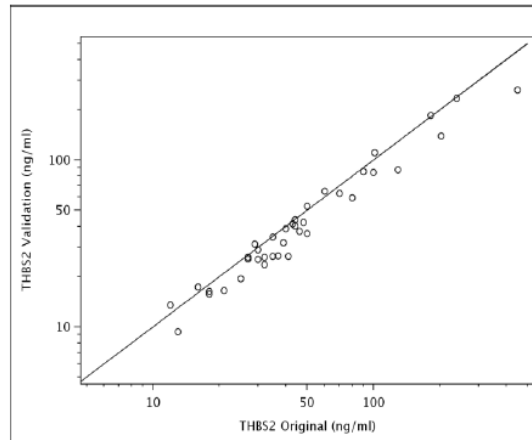

Correlation Coefficient, Pearson=0.950 Spearman=0.968

### B. Scatterplot of original THBS vs. validation THBS2 for N=38 samples (re-scaled data)

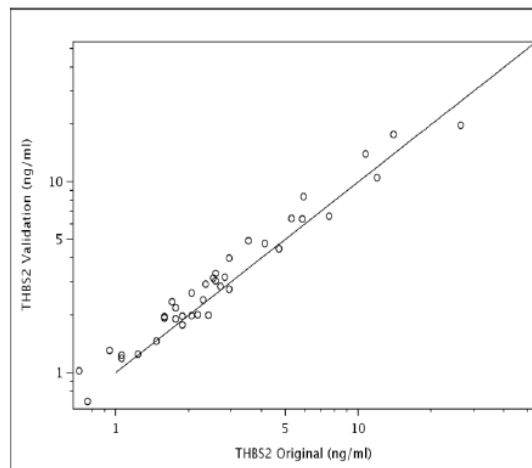

Correlation Coefficient, Pearson=0.950 Spearman=0.968

**Fig. S5. Cross-validation tests, performed 1 year apart, of THBS2 concentrations in the same set of plasmas as determined in different laboratories.**

A subset of Phase 2b samples were cross-validated in a blinded fashion, in an independent lab that was provided only the relevant methods section of this paper and the manufacturer's instructions for methodology.

(A) Scatterplot of original THBS2 values versus cross-validated THBS2 values, as determined one year later with a different lot number of reagents, in subset of Phase 2b plasma samples (n=38). The X-axis indicates

the THBS2 values originally obtained in 2015 and Y-axis indicates the THBS2 values cross-validated by an independent lab in 2016. The Pearson correlation coefficient is 0.95 and the Spearman coefficient is 0.968, indicating a strong correlation between the original and validated assays.

(B) Scatterplot of original THBS2 versus cross-validated THBS2 values rescaled by commercial human normal pooled plasma. The average THBS2 value in the normal pooled plasma control in the original assay, where our set point was derived, was 17 ng/ml and the average THBS2 value in the normal pooled plasma control in the cross-validated samples was 13.25. Thus we re-plotted the data, as shown, by dividing the cross-validation samples by the scaling factor as described in the text. The re-scaled THBS2 values in cross-validation had a negligible effect on the correlation coefficient, indicating a robust assay.

## Figure S6

Representative immunohistochemistry (IHC) images of THBS2 in human normal pancreas, pancreatitis, and PDAC tissue

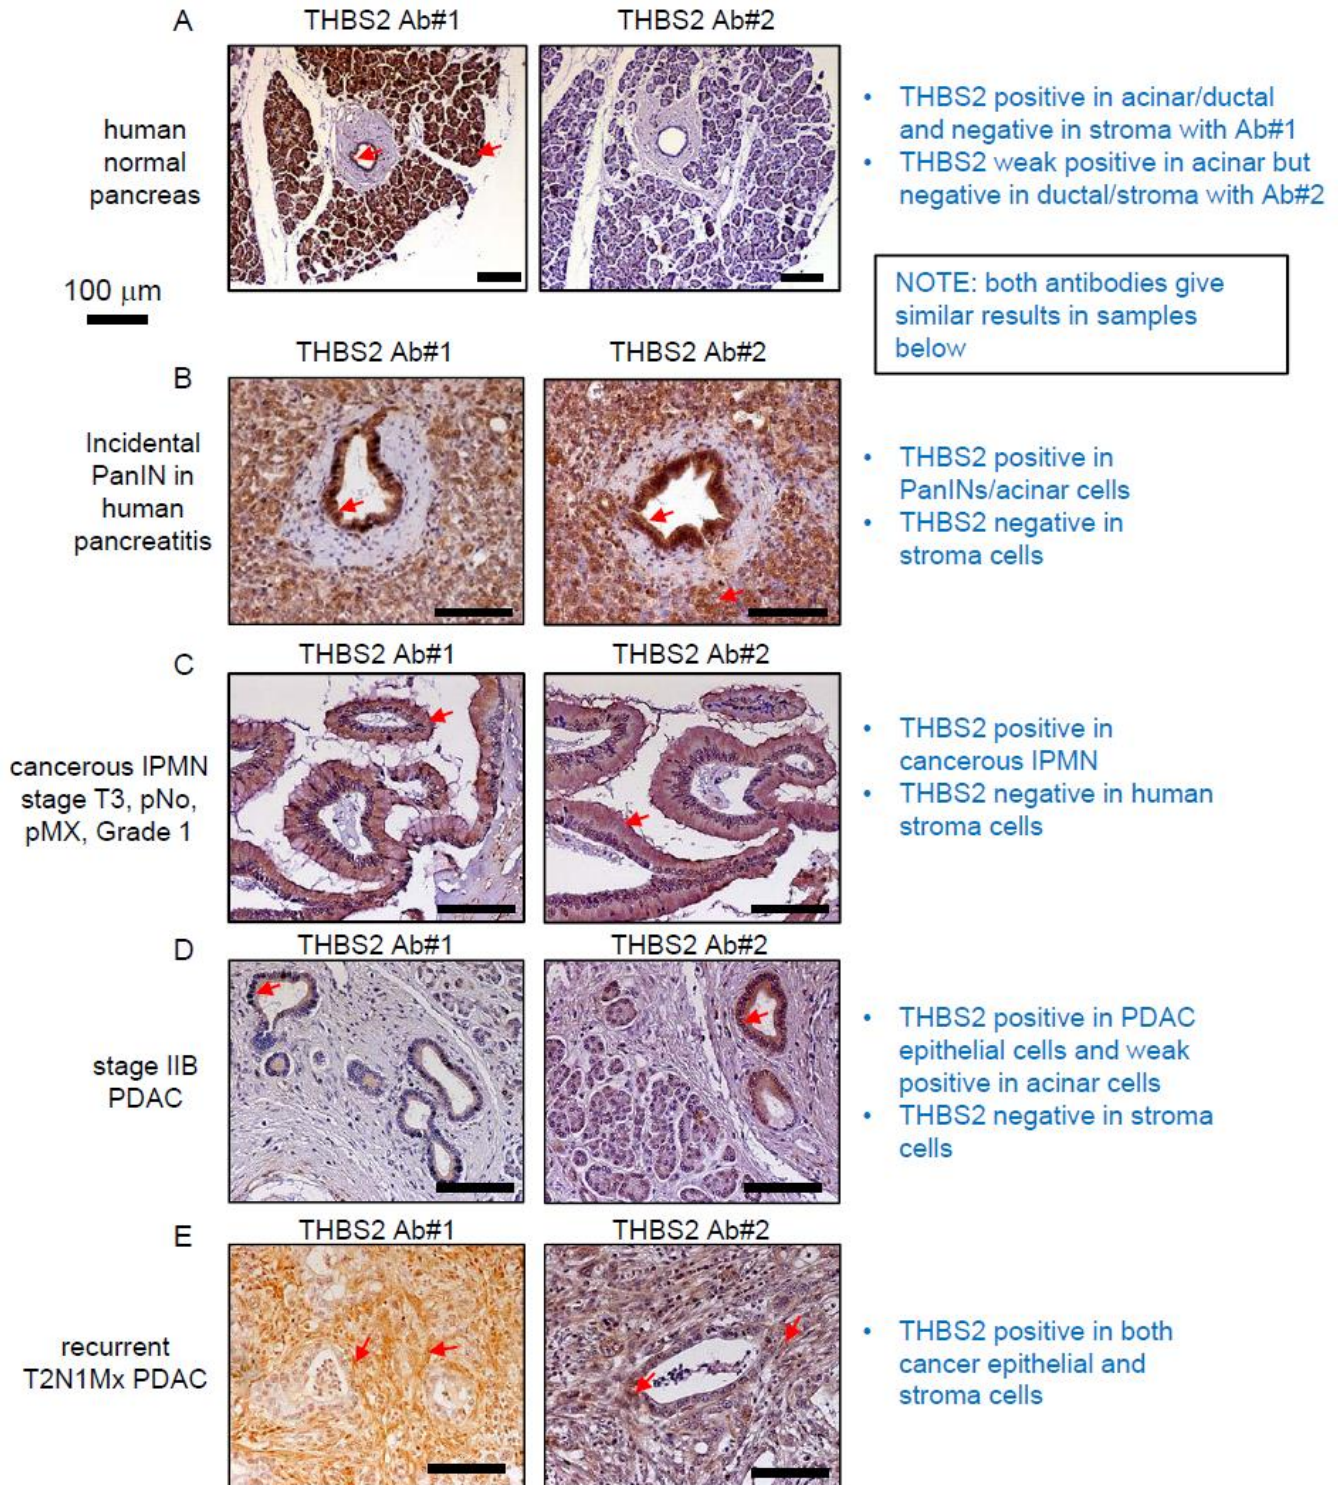

**Fig. S6. Representative immunohistochemistry images of THBS2 in human normal pancreas, pancreatitis, and PDAC tissue.**

Two “IHC quality” THBS2 antibodies were tested: Ab#1 (rabbit polyclonal THBS2 antibody, dilution 1:100, TA590658, Origene) and Ab#2 (Goat polyclonal THBS2 antibody, dilution 1:25, sc-7655, Santa Cruz). Red arrows designate positive cells. Scale bar equals 100 microns in each image.

(A) IHC in human normal pancreas. THBS2 was detected in acinar and ductal compartment but not in stroma with Ab#1. However, THBS2 was barely detected in the acinar compartment and not in ducts or stroma with Ab#2.

(B) IHC in human pancreatitis. THBS2 was detected in incidental PanINs in pancreatitis and acinar cells but not in stroma cells with both antibodies.

(C) IHC in cancerous IPMN stage T3, pNo, pMX, Grade 1. THBS2 was detected in cancerous IPMN but not in stromal cells with both antibodies.

(D) IHC in PDAC stage 2b. THBS2 was detected in PDAC epithelial cells and weakly labeled in acinar cells, but not in stroma cells with both antibodies.

(E) IHC in recurrent T2N1Mx PDAC. THBS2 was detected in both cancer epithelial and stroma cells with both antibodies. Brown colors indicate the compartments labeled with THBS2 in the left panel.

**Table S1. List of 53 proteins secreted or released from 10-22 cell, PanIN-stage lesions that are at low abundance in healthy human plasma proteome and RNA-seq databases.**

| IPI number  | Protein       | PDAC Network from Kim et al. 2013 Cell Reports | Identified in plasma protein DB (as of 2014) | Identified in plasma MOPED database As of 2014 | ELISA kits available |
|-------------|---------------|------------------------------------------------|----------------------------------------------|------------------------------------------------|----------------------|
| IPI00152881 | SHROOM3       | TGFb/Integrin                                  | yes                                          | 0.1 nmol                                       | no                   |
| IPI00215893 | HMOX1         | TGFb/Integrin                                  | yes                                          | 0 nmol                                         | no                   |
| IPI00007960 | *PERIOSTIN    | TGFb/Integrin                                  | yes                                          | no information                                 | yes                  |
| IPI00013405 | MMP10         | TGF/Integrin                                   | no                                           | 0 nmol                                         | yes                  |
| IPI00027780 | MMP-2         | TGF/Integrin                                   | no                                           | 2 nmol                                         | yes                  |
| IPI00018769 | THBS2         | TGF/Integrin                                   | yes                                          | no information                                 | yes                  |
| IPI00009841 | EWSR1         | TGFb/Integrin                                  | yes                                          | no information                                 | no                   |
| IPI00005776 | NOD1          | TGF/Integrin                                   | yes                                          | 1 nmol                                         | no                   |
| IPI00220986 | ADAMTS9       | TGF/Integrin                                   | yes                                          | 1 nmol                                         | no                   |
| IPI00022443 | *AFP          | TGF/Integrin                                   | yes                                          | 1 nmol                                         | yes                  |
| IPI00247295 | SYNE1         | TGF/Integrin                                   | yes                                          | 0.2 nmol                                       | no                   |
| IPI00239405 | SYNE2         | TGFb/Integrin                                  | yes                                          | no information                                 | no                   |
| IPI00008315 | EPHB1         | TGFb/Integrin                                  | yes                                          | 0 nmol                                         | no                   |
| IPI00218292 | UFD1L         | TGFb/Integrin                                  | no                                           | 0 nmol                                         | no                   |
| IPI00002901 | TEAD1         | TGFb/Integrin                                  | no                                           | 0 nmol                                         | no                   |
| IPI00027280 | TOP2B         | TGFb/Integrin                                  | yes                                          | 0.1-1 nmol                                     | no                   |
| IPI00217185 | RYR3          | TGF/Integrin                                   | yes                                          | 0.8 nmol                                       | no                   |
| IPI00166612 | CMYA5         | TGF/Integrin                                   | yes                                          | 0 nmol                                         | no                   |
| IPI00221255 | MYLK          | TGF/Integrin                                   | yes                                          | 0.2 nmol                                       | no                   |
| IPI00251161 | KIAA1109      | RAS/p53/JUN/CTNB1                              | yes                                          | 0.1 nmol                                       | no                   |
| IPI00398020 | ODZ3          | RAS/p53/JUN/CTNB1                              | yes                                          | no information                                 | no                   |
| IPI00235481 | PMFBP1        | RAS/p53/JUN/CTNB1                              | yes                                          | 0.1 nmol                                       | no                   |
| IPI00289329 | EPHB3         | RAS/p53/JUN/CTNB1                              | yes                                          | no information                                 | no                   |
| IPI00177498 | LIMCH1        | RAS/p53/JUN/CTNB1                              | yes                                          | no information                                 | no                   |
| IPI00159322 | TCF20         | RAS/p53/JUN/CTNB1                              | yes                                          | 0.1 nmol                                       | no                   |
| IPI00847609 | SVEP1         | no network                                     | yes                                          | 0.1 nmol                                       | no                   |
| IPI00396634 | KIAA1671      | no network                                     | no                                           | 0 nmol                                         | no                   |
| IPI00292836 | KIAA1529      | no network                                     | yes                                          | 0 nmol                                         | no                   |
| IPI00896378 | GNN           | no network                                     | no                                           | no information                                 | no                   |
| IPI00420019 | DOS           | no network                                     | no                                           | 0.5 nmol                                       | no                   |
| IPI00293887 | STARD8 (DLC3) | no network                                     | yes                                          | 0 nmol                                         | no                   |
| IPI00183041 | SCN8A         | no network                                     | yes                                          | 0.5 nmol                                       | no                   |
| IPI00143753 | U2SURP        | no network                                     | no                                           | 0 nmol                                         | no                   |
| IPI00031104 | TCHP          | no network                                     | yes                                          | 1 nmol                                         | no                   |
| IPI00012829 | RAD51C        | no network                                     | yes                                          | no information                                 | no                   |
| IPI00024804 | ATP2A1        | no network                                     | yes                                          | 0 nmol                                         | no                   |
| IPI00377214 | NLRX1         | no network                                     | no                                           | 0 nmol                                         | no                   |
| IPI00028833 | ZNF160        | no network                                     | yes                                          | 1 nmol                                         | no                   |
| IPI00645947 | RTTN          | no network                                     | no                                           | 0 nmol                                         | no                   |
| IPI00328762 | ABCA13        | no network                                     | yes                                          | 0 nmol                                         | no                   |

|             |            |       |     |          |    |
|-------------|------------|-------|-----|----------|----|
| IPI00288940 | OBSCN      | HNF4a | yes | 0.1 nmol | no |
| IPI00011385 | LOXL3      | HNF4a | yes | 0 nmol   | no |
| IPI00029046 | MLEC       | HNF4a | yes | 0 nmol   | no |
| IPI00002127 | DNAH1      | HNF4a | yes | 0 nmol   | no |
| IPI00152653 | DNAH5      | HNF4a | yes | 1 nmol   | no |
| IPI00412106 | DNAH12     | HNF4a | yes | 1 nmol   | no |
| IPI00888430 | DNAH17     | HNF4a | no  | 0 nmol   | no |
| IPI00396218 | SCYL2      | HNF4a | yes | 0 nmol   | no |
| IPI00303300 | FKBP10     | HNF4a | no  | 0 nmol   | no |
| IPI00002320 | FLRT3      | HNF4a | yes | 0 nmol   | no |
| IPI00007256 | ZHX2(AFR1) | HNF4a | yes | 0 nmol   | no |
| IPI00375560 | ZNF804A    | HNF4a | no  | 0.1 nmol | no |
| IPI00019884 | ACTN2      | HNF4a | yes | 0.1 nmol | no |

\* AFP and PERIOSTIN were not chosen because of their indication in hepatocellular carcinoma and breast cancer, respectively.

**Table S2. Mass spectrometry assessment of THBS2 concentrations in phase 1 plasma samples.**

**Table S2A. Peptides searched with pFind 2.8 at 5% FDR**

| Table S2A                                      | sequence       | presence of peptides by search engine pFind 2.8 |                             | area under the curve of THBS2 spectrum from original ms1/ms2 window |                             | THBS2 ratio, cancer/normal | *adjusted ratio of THBS2 by total PSM | FDR    |
|------------------------------------------------|----------------|-------------------------------------------------|-----------------------------|---------------------------------------------------------------------|-----------------------------|----------------------------|---------------------------------------|--------|
|                                                |                | Pooled normal controls (n=10)                   | Pooled PDAC patients (n=10) | Pooled normal controls (n=10)                                       | Pooled PDAC patients (n=10) |                            |                                       |        |
| peptide 1 (THBS2 specific)                     | TRNMSACWQDGR   | presence                                        | n.d (not-determined)        | 55814                                                               | 261090                      | 4.68                       | 3.04                                  | FDR 5% |
| peptide 2 (THBS2 specific)                     | VCNSPEPQYGGK   | n.d                                             | presence                    | 0                                                                   | 792162                      | n.d.                       | n.d.                                  | FDR 5% |
| peptide 3 (THBS1/THBS2 shared)                 | FYVVMWK        | presence                                        | n.d                         | 4599455                                                             | 13383548                    | 2.9                        | 1.88                                  | FDR 5% |
| peptide4 (THBS1/THBS2 shared)                  | NALWHTGNTPGQVR | n.d                                             | presence                    | 8373610                                                             | 21837763                    | 2.6                        | 1.69                                  | FDR 5% |
| Total number of PSM (peptide spectrum matches) |                |                                                 |                             | 22330                                                               | 34402                       | 1.54                       |                                       | FDR 5% |

\* Adjusted ratio of THBS2 was calculated from the original ratio THBS2 dividing by a normalization factor (1.54) acquired by dividing the total number of peptide spectrum matches (PSM) in cancer by the total PSM number in the normal sample. The ratio for peptide 2 and the overall average ratio of THBS2 was not computed because peptide 2 was only observed in the PDAC pooled sample.

**Table S2B. Peptides searched with pFind3.0 at 5% FDR**

| Table S2B                      | sequence       | presence of peptides by search engine pFind 3. |                             | FDR    |
|--------------------------------|----------------|------------------------------------------------|-----------------------------|--------|
|                                |                | Pooled normal controls (n=10)                  | Pooled PDAC patients (n=10) |        |
| peptide 1 (THBS2 specific)     | TRNMSACWQDGR   | n.d                                            | n.d                         | FDR 5% |
| peptide 2 (THBS2 specific)     | VCNSPEPQYGGK   | n.d                                            | presence                    | FDR 5% |
| peptide 3 (THBS1/THBS2 shared) | FYVVMWK        | presence                                       | n.d                         | FDR 5% |
| peptide4 (THBS1/THBS2 shared)  | NALWHTGNTPGQVR | presence                                       | presence                    | FDR 5% |

**Table S2C. Peptides searched with pFind3.0 at 1% FDR**

| Table S2C                      | sequence       | presence of peptides by search engine pFind 3.0 |                             | FDR    |
|--------------------------------|----------------|-------------------------------------------------|-----------------------------|--------|
|                                |                | Pooled normal controls (n=10)                   | Pooled PDAC patients (n=10) |        |
| peptide 1 (THBS2 specific)     | TRNMSACWQDGR   | n.d                                             | n.d                         | FDR 1% |
| peptide 2 (THBS2 specific)     | VCNSPEPQYGGK   | n.d                                             | presence                    | FDR 1% |
| peptide 3 (THBS1/THBS2 shared) | FYVVMWK        | n.d                                             | n.d                         | FDR 1% |
| peptide4 (THBS1/THBS2 shared)  | NALWHTGNTPGQVR | presence                                        | presence                    | FDR 1% |



**Table S3. Range and median values of THBS2 and CA19-9 in this study.**

| <b>THBS2</b>   | <b>n</b> | <b>median</b> | <b>min</b> | <b>P_25</b> | <b>P_75</b> | <b>max</b> |
|----------------|----------|---------------|------------|-------------|-------------|------------|
| Adenocarcinoma | 288      | 37.171        | 11.590     | 25.6620     | 60.80       | 451.40     |
| Stage I/II     | 152      | 35.291        | 11.590     | 25.582      | 55.41       | 451.40     |
| Stage III/IV   | 136      | 40.797        | 11.699     | 26.621      | 67.10       | 269.71     |
| Controls       | 230      | 19.298        | 6.425      | 16.521      | 24.10       | 73.39      |
| IPMN, no Adeno | 115      | 24.666        | 10.142     | 19.426      | 32.55       | 72.52      |
| Islet Cell     | 30       | 30.033        | 13.872     | 22.212      | 45.67       | 433.46     |
| Pancreatitis   | 83       | 24.094        | 6.458      | 17.949      | 31.74       | 209.12     |

| <b>Ca19-9</b>  | <b>n</b> | <b>median</b> | <b>min</b> | <b>P_25</b> | <b>P_75</b> | <b>max</b> |
|----------------|----------|---------------|------------|-------------|-------------|------------|
| Adenocarcinoma | 288      | 219.500       | 0.599      | 55.9000     | 1137.00     | 10000.00   |
| Stage I/II     | 152      | 141.000       | 0.599      | 31.800      | 442.00      | 10000.00   |
| Stage III/IV   | 136      | 615.500       | 0.600      | 103.000     | 3973.00     | 10000.00   |
| Controls       | 230      | 8.650         | 0.599      | 5.400       | 14.00       | 136.00     |
| IPMN, no Adeno | 115      | 12.200        | 0.600      | 6.700       | 21.30       | 56.20      |
| Islet Cell     | 30       | 11.200        | 0.599      | 5.100       | 29.10       | 461.00     |
| Pancreatitis   | 83       | 14.700        | 0.600      | 8.500       | 32.20       | 833.00     |

**Table S4. Impact of excluding stage IIB (and unspecified stage II) subjects.**

| PDAC vs.<br>Healthy Controls | N      | CA19-9( $\geq 55$ ) |        |      | THBS2 |        |      | CA19-9( $\geq 55$ ) + THBS2 |        |      | p-value |
|------------------------------|--------|---------------------|--------|------|-------|--------|------|-----------------------------|--------|------|---------|
|                              |        | AUC                 | 95% CI |      | AUC   | 95% CI |      | AUC                         | 95% CI |      |         |
| <b>Validation Phase 2a</b>   |        |                     |        |      |       |        |      |                             |        |      |         |
| Stage I/IIA/II/IIB           | 58/80  | 0.845               | 0.80   | 0.89 | 0.832 | 0.78   | 0.89 | 0.946                       | 0.92   | 0.98 | 0.0067  |
| Stage I/IIA/II               | 37/80  | 0.851               | 0.80   | 0.91 | 0.810 | 0.74   | 0.89 | 0.937                       | 0.90   | 0.98 | 0.0767  |
| Stage I/IIA                  | 21/80  | 0.905               | 0.85   | 0.97 | 0.819 | 0.73   | 0.91 | 0.919                       | 0.85   | 1.00 | 0.7058  |
| <b>Validation Phase 2b</b>   |        |                     |        |      |       |        |      |                             |        |      |         |
| Stage I/IIA/II/IIB           | 88/140 | 0.834               | 0.79   | 0.87 | 0.887 | 0.85   | 0.92 | 0.960                       | 0.94   | 0.98 | <0.0001 |
| Stage I/IIA/II               | 62/140 | 0.824               | 0.78   | 0.87 | 0.861 | 0.82   | 0.90 | 0.950                       | 0.93   | 0.97 | 0.0002  |
| Stage I/IIA                  | 25/140 | 0.773               | 0.70   | 0.86 | 0.905 | 0.86   | 0.95 | 0.958                       | 0.93   | 0.98 | 0.0005  |

**Table S5A. THBS2 values by sex and diabetes mellitus status.**

| group                              | n   | median  | min    | P_25    | P_75    | max     |
|------------------------------------|-----|---------|--------|---------|---------|---------|
| IPMN Female                        | 57  | 25.8860 | 12.096 | 20.7010 | 32.2340 | 70.881  |
| IPMN Male                          | 58  | 24.1590 | 10.142 | 18.5610 | 33.2390 | 72.515  |
| PNET Female                        | 8   | 29.3040 | 21.391 | 24.1965 | 45.8290 | 100.724 |
| PNET Male                          | 22  | 32.7955 | 13.872 | 19.1610 | 45.6740 | 433.460 |
| Pancreatitis Female                | 36  | 21.0220 | 6.458  | 17.6355 | 30.4205 | 67.388  |
| Pancreatitis Male                  | 46  | 25.2530 | 11.409 | 19.0730 | 36.3010 | 209.117 |
| Adenocarcinoma Stage I/II Female   | 60  | 38.0070 | 15.182 | 30.2070 | 61.8390 | 216.687 |
| Adenocarcinoma Stage I/II Male     | 92  | 31.8888 | 11.590 | 22.5440 | 51.6485 | 451.397 |
| Adenocarcinoma Stage III/IV Female | 60  | 40.5035 | 15.698 | 26.2460 | 67.0990 | 218.449 |
| Adenocarcinoma Stage III/IV Male   | 76  | 40.8955 | 11.699 | 27.1895 | 67.2140 | 269.711 |
| Controls Female                    | 101 | 20.7900 | 12.012 | 17.2330 | 26.2680 | 65.573  |
| Controls Male                      | 129 | 18.1210 | 6.425  | 15.4790 | 22.3270 | 73.392  |
| IPMN No DM                         | 95  | 23.8800 | 10.142 | 19.3670 | 29.9620 | 60.287  |
| IPMN DM                            | 20  | 34.1695 | 13.764 | 24.6135 | 51.5630 | 72.515  |
| PNET No DM                         | 20  | 28.6720 | 13.872 | 20.2760 | 62.8445 | 433.460 |
| PNET DM                            | 10  | 39.3765 | 13.967 | 23.1640 | 44.9590 | 111.390 |
| Pancreatitis No DM                 | 72  | 24.5510 | 6.458  | 18.1123 | 30.4205 | 209.117 |
| Pancreatitis DM                    | 10  | 26.1715 | 11.637 | 18.4470 | 42.5880 | 77.424  |
| Adenocarcinoma Stage I/II No DM    | 102 | 35.0490 | 11.590 | 25.5830 | 57.6440 | 248.952 |
| Adenocarcinoma Stage I/II DM       | 50  | 37.2575 | 15.599 | 23.2920 | 53.7950 | 451.397 |
| Adenocarcinoma Stage III/IV No DM  | 108 | 38.7715 | 11.699 | 27.7875 | 68.5970 | 269.711 |
| Adenocarcinoma Stage III/IV DM     | 28  | 43.7983 | 15.698 | 23.8990 | 65.1340 | 238.642 |
| Controls No DM                     | 201 | 19.2820 | 6.425  | 16.5060 | 23.6850 | 65.573  |
| Controls DM                        | 29  | 19.3320 | 9.654  | 17.0210 | 24.4930 | 73.392  |

**Table S5B. Spearman correlation analysis of age and THBS2 values.**

| group                       | Spearman Correlation |
|-----------------------------|----------------------|
| IPMN                        | -0.00401             |
| PNET                        | -0.15872             |
| Pancreatitis                | -0.02588             |
| Adenocarcinoma Stage I/II   | -0.08581             |
| Adenocarcinoma Stage III/IV | -0.11019             |
| Controls                    | 0.06188              |

**Table S6A. Obstructive jaundice cases in the PDAC cohorts.**

| Stage | Obstructive Jaundice (Total Bilirubin $\geq$ 3.5) |    |       |     |       |       |
|-------|---------------------------------------------------|----|-------|-----|-------|-------|
|       | Unknown                                           | No |       | Yes |       | Total |
|       | N                                                 | N  | %     | N   | %     | N     |
| I     | 0                                                 | 4  | 80.0  | 1   | 20.0  | 5     |
| IA    | 0                                                 | 0  | 0.0   | 3   | 100.0 | 3     |
| IB    | 0                                                 | 8  | 80.0  | 2   | 20.0  | 10    |
| II    | 2                                                 | 42 | 80.77 | 10  | 19.23 | 52    |
| IIA   | 1                                                 | 16 | 57.14 | 12  | 42.86 | 28    |
| IIB   | 2                                                 | 36 | 73.47 | 13  | 26.53 | 49    |
| III   | 3                                                 | 35 | 71.43 | 14  | 28.57 | 49    |
| IV    | 1                                                 | 68 | 81.93 | 15  | 18.07 | 83    |
| Total | 9                                                 |    | 209   |     | 70    | 279   |

**Table S6B. THBS2 and CA19-9 values and obstructive jaundice status.**

| Obstructive Jaundice | Ca19-9 (U/ml) | THBS2 (ng/ml) |     |           |    |       |    |
|----------------------|---------------|---------------|-----|-----------|----|-------|----|
|                      |               | <42           |     | $\geq$ 42 |    | Total |    |
|                      |               | N             | %   | N         | %  | N     | %  |
| Unknown              | < 55          | 1             | 100 | 0         | 0  | 1     | 11 |
| Unknown              | $\geq$ 55     | 6             | 75  | 2         | 25 | 8     | 89 |
| No                   | < 55          | 41            | 75  | 14        | 25 | 55    | 25 |
| No                   | $\geq$ 55     | 96            | 62  | 58        | 38 | 154   | 74 |
| Yes                  | < 55          | 5             | 38  | 8         | 62 | 13    | 19 |
| Yes                  | $\geq$ 55     | 13            | 23  | 44        | 77 | 57    | 81 |

**Table S6C. AUC values for CA19-9, THBS2, and combined markers by jaundice status in phases 2a and 2b of PDAC cases versus controls.**

|                             | N       | Ca19-9 |            | THBS2 |            | CA19-9+THBS2 |            |
|-----------------------------|---------|--------|------------|-------|------------|--------------|------------|
|                             |         | AUC    | 95% CI     | AUC   | 95% CI     | AUC          | 95% CI     |
| Phase 2a PDAC               | 81/80   | 0.846  | 0.81, 0.88 | 0.843 | 0.80, 0.89 | 0.955        | 0.93, 0.98 |
| Phase 2a PDAC - Jaundice    | 13/80   | 0.923  | 0.83, 1.00 | 0.931 | 0.87, 0.99 | 0.977        | 0.94, 1.00 |
| Phase 2a PDAC – No Jaundice | 65/80   | 0.831  | 0.78, 0.88 | 0.819 | 0.76, 0.88 | 0.950        | 0.92, 0.98 |
| Phase 2b PDAC               | 197/140 | 0.881  | 0.86, 0.90 | 0.875 | 0.85, 0.90 | 0.970        | 0.96, 0.98 |
| Phase 2b PDAC - Jaundice    | 54/140  | 0.891  | 0.85, 0.94 | 0.974 | 0.96, 0.99 | 0.991        | 0.98, 1.00 |
| Phase 2b PDAC – No Jaundice | 138/140 | 0.873  | 0.84, 0.90 | 0.837 | 0.80, 0.87 | 0.962        | 0.95, 0.98 |

**Table S7A. Cross-tabulation of normal versus elevated THBS2 values, given a cutoff of 42 ng/ml, for the original cross-validation THBS2 assays ( $\kappa = 0.786$ ).**

| THBS2<br>(ng/ml) | THBS2 Validation |           | Total |
|------------------|------------------|-----------|-------|
|                  | < 42             | $\geq 42$ |       |
| < 42             | 20               | 0         | 20    |
| $\geq 42$        | 4                | 14        | 18    |
| Total            | 24               | 14        | 38    |

**Table S7B. Cross-tabulation of normal versus elevated scaled THBS2 values, given a cutoff of 2.47, for the original and cross-validation THBS2 assays ( $\kappa = 0.895$ ).**

| THBS2<br>(ng/ml) | THBS2 Validation |             | Total |
|------------------|------------------|-------------|-------|
|                  | < 2.47           | $\geq 2.47$ |       |
| < 2.47           | 18               | 2           | 20    |
| $\geq 2.47$      | 0                | 18          | 18    |
| Total            | 18               | 20          | 38    |

**Table S8. Summary of THBS2 immunohistochemistry in a total of 42 human PDAC and 4 cases of incidental PanIN and intraductal papillary mucinous neoplasm by immunohistochemistry.**

|                                                                                  | PDAC                              | PanINs/IPMN | % THBS2 positive in PDAC | % THBS2 positive in PanINs/IPMN |
|----------------------------------------------------------------------------------|-----------------------------------|-------------|--------------------------|---------------------------------|
| total (N)                                                                        | 42 (tissue array n=38, FCCC n= 4) | 4 (FCCC)    | 100                      | 100                             |
| THBS2 positive sections                                                          | 42 (tissue array n=38, FCCC n=4)  | 4 (FCCC)    | 100                      | 100                             |
| the number of sections THBS2 positive in epithelial cells of PDAC or PanINs/IPMN | 32 (tissue array n=30, FCCC n=2)  | 4 (FCCC)    | 76                       | 100                             |
| the number of sections THBS2 positive in both epithelial and fibroblast cells    | 21 (tissue array n=19, FCCC n=2)  | 0 (FCCC)    | 50                       | 0                               |
| THBS2 positive in only poorly differentiated PDAC or fibroblast cells            | 8 (tissue array n=8, FCCC n=0)    | 0 (FCCC)    | 19                       | 0                               |

FCCC = samples from the repository at the Fox Chase Cancer Center
